# Supplementary material
Source: PubMed Central journal article supplement (PMC6398129)
Supplement: supp_RA118.005532_140348_1_supp_252339_pjvvdt.pdf [file supp_RA118.005532_140348_1_supp_252339_pjvvdt.pdf]

Syntaxin 3, but not Syntaxin 4, is required for mast cell regulated exocytosis, where it plays a primary role mediating compound exocytosis

**Elizabeth Sanchez<sup>1,2</sup>, Erika A. Gonzalez<sup>1,2</sup>, David S. Moreno<sup>1,2</sup>, Rodolfo A. Cardenas<sup>1,2</sup>, Marco A. Ramos<sup>1,2</sup>, Alfredo J. Davalos<sup>1,2</sup>, John Manillo<sup>1,2</sup>, Alejandro I. Rodarte<sup>1,2</sup>, Youlia Petrova<sup>1</sup>, Daniel C. Moreira<sup>1,2</sup>, Miguel A. Chavez<sup>1,2</sup>, Alejandro Tortoriello<sup>1,2</sup>, Adolfo Lara<sup>3</sup>, Berenice A. Gutierrez<sup>1,2</sup>, Alan R. Burns<sup>4</sup>, Ruth Heidelberger<sup>3</sup>, Roberto Adachi<sup>1\*</sup>**

From the <sup>1</sup>Department of Pulmonary Medicine, The University of Texas MD Anderson Cancer Center, Houston, Texas 77030, <sup>2</sup>Tecnologico de Monterrey, Escuela de Medicina y Ciencias de la Salud, Monterrey, Nuevo León 64710, México, <sup>3</sup>Department of Neurobiology and Anatomy, McGovern Medical School at The University of Texas Health Science Center at Houston, Houston, Texas 77030, and <sup>4</sup>College of Optometry, University of Houston, Houston, Texas 77204.

## **SUPPORTING INFORMATION**

### **Supplemental Figures**

|                                                                                  |     |
|----------------------------------------------------------------------------------|-----|
| Figure S1. Generation of the Stx3 and Stx4 cKO mice.....                         | S-2 |
| Figure S2. Expression of Stx3 does not affect expression of Munc18-2 in MCs..... | S-3 |

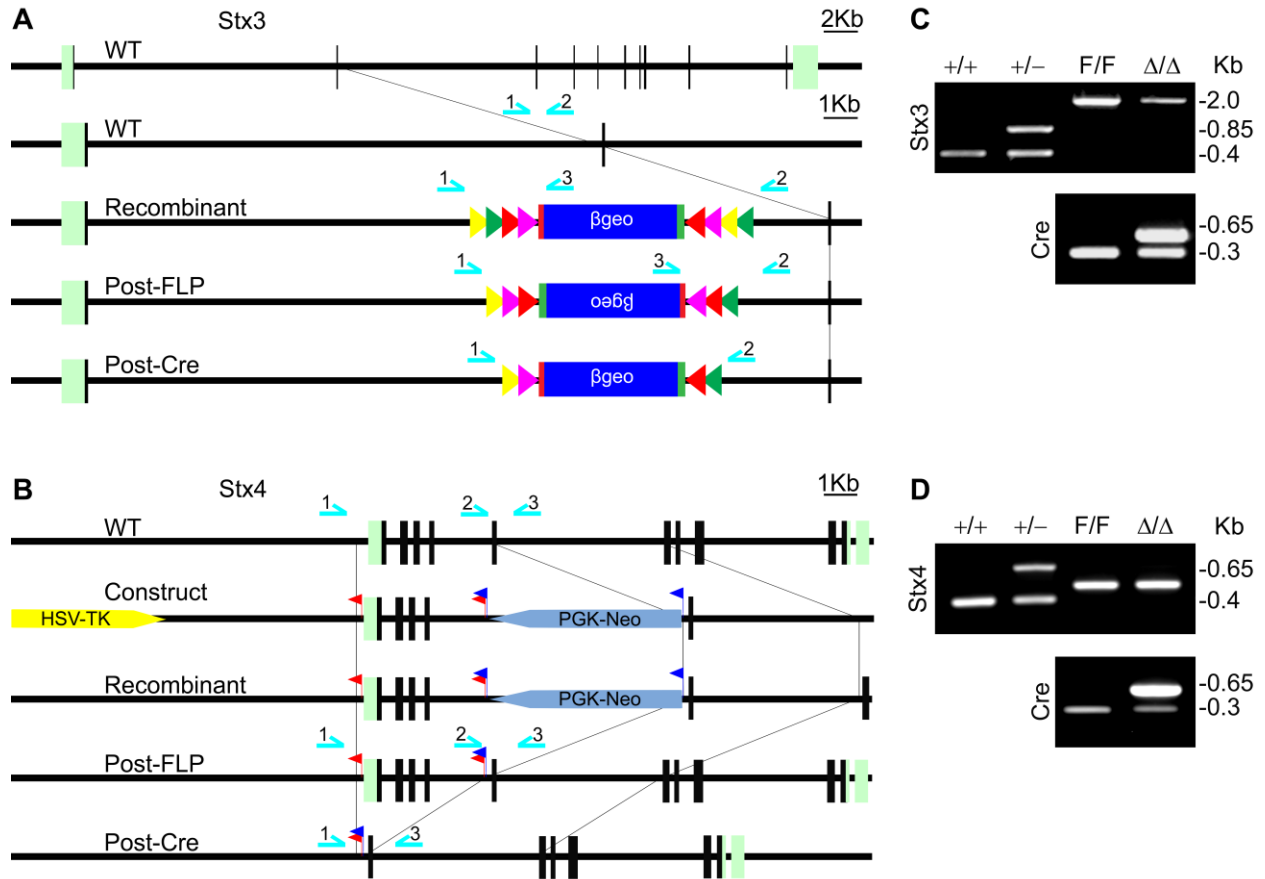

**Figure S1. Generation of the *Stx3* and *Stx4* cKO mice.** Shown are diagrams of the strategies followed to make the *Stx3* (A) and *Stx4* (B) cKO mice. A, after Cre recombination, the cassette introduced in intron 1 of *Stx3* is inverted and locked (bottom diagram). When transcription of *Stx3* is initiated the splice acceptor forces transcription of  $\beta$ geo, and a polyadenylation site interrupts transcription of the rest of the *Stx3* gene. B, removal of exons 1-4 of *Stx4* by Cre recombinase (bottom diagram) eliminates the translation initiation site and expression of *Stx4*. Vertical bars, exons; light-green bars, untranslated region; black bars, protein-coding region; triangles, location and direction of recombination sites; yellow triangle, FRT; green triangle, F3; red triangle, loxP; pink triangle, lox511; red rectangle, splice acceptor site;  $\beta$ geo,  $\beta$ -galactosidase/neomycin phosphotransferase fusion gene; green rectangle, polyadenylation site; blue flag, FRT site; red flag, loxP site; HSV-TK, herpes simplex virus thymidine kinase; PGK-Neo, phosphoglucokinase promoter-driven neomycin phosphotransferase gene; light-blue arrowheads, primers for genotyping. PCR products from genomic tail DNA from *Stx3* (C) and *Stx4* (D) mutant mice with the primers in panels A and B respectively.

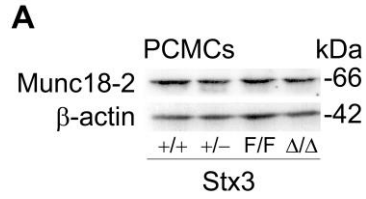

**Figure S2. Expression of Stx3 does not affect expression of Munc18-2 in MCs.** Shown is a representative immunoblot of lysates from MCs obtained from different Stx3 mutant mice probed with anti-Munc18-2 antibody. β-actin was used as loading control.
